# Supplementary material for: The neural crest epithelial-mesenchymal transition in 4D: a `tail' of multiple non-obligatory cellular mechanisms
Source: Oxford University Press journal article supplement (doi:10.1242/dev.034785), 2009-05-08
Supplement: dev034785tables1.pdf [file dev034785tables1.pdf]

**Table S1. Live cell imaging summary**

| Imaging sessions | Normal slices | Hours per session | Total # nt cells | EMTs recorded | EMTs: cell tail retraction | EMTs: non-apical mitosis |
|------------------|---------------|-------------------|------------------|---------------|----------------------------|--------------------------|
| 21               | 54            | 13-29             | 1567             | 132           | 95 (C=25, R=3)             | 37 (div=27)              |

The 'Total # nt cells' column represents only those dorsal neural tube cells that were labeled and initially visible in the confocal field (not all neural tube cells are labeled by electroporation, resulting in a mosaic pattern of fluorescence expression). In the 'EMTs: cell tail retraction' column, 'C' indicates the number of cell tail retractions that were complete, or 'clean', detachments, and 'R' indicates the number of cell tail retractions that had 'ruptured' cell tails. nt, neural tube; div, divisions.
