# Supplementary material for: The neural crest epithelial-mesenchymal transition in 4D: a `tail' of multiple non-obligatory cellular mechanisms
Source: Oxford University Press journal article supplement (doi:10.1242/dev.034785), 2009-05-08
Supplement: dev034785tables2.pdf [file dev034785tables2.pdf]

**Table S2. Cell cycle analysis**

| Cleavage plane | Average time (hr:min) cell cycle neural tube cells (n) | Average time (hr:min) cell cycle pre-neural crest cells (n) | <i>P</i> value |
|----------------|--------------------------------------------------------|-------------------------------------------------------------|----------------|
| 60-90°         | 9:53 ±2:38 (7)                                         | (0)                                                         | –              |
| 30-60°         | (0)                                                    | (0)                                                         | –              |
| 0-30°          | 10:06 ±1:46 (5)                                        | 4:56 ±1:04 (2)                                              | 0.19           |

The length of the cell cycle was determined for cells that underwent two successive divisions, with either both cell divisions within the neural tube (neural tube cells), or the first division inside the neural tube and the second division outside the neural tube as a neural crest cell (pre-neural crest cells). '60-90°' refers to a perpendicular cleavage plane, '30-60°' is inbetween, and '0-30°' is a parallel mitotic cleavage plane. *P* values were determined by one-way ANOVA with alpha=0.05. Averages are given (± s.e.m.). hr, hour; min, minute.
