# Supplementary material for: The neural crest epithelial-mesenchymal transition in 4D: a `tail' of multiple non-obligatory cellular mechanisms
Source: Oxford University Press journal article supplement (doi:10.1242/dev.034785), 2009-05-08
Supplement: dev034785tables3.pdf [file dev034785tables3.pdf]

**Table S3. The velocity of nuclear migration and the maximum basal distance attained during interkinetic nuclear migration**

|                                                                                       | Neural tube cells (n=12) | Pre-neural crest cells (n=26) | P value |
|---------------------------------------------------------------------------------------|--------------------------|-------------------------------|---------|
| <b>Average velocity from basal to apical surface (<math>\mu\text{m/hr}</math>)</b>    | 66 ( $\pm 12$ )          | 54 ( $\pm 9$ )                | 0.44    |
| <b>Average velocity after mitosis to basal position (<math>\mu\text{m/hr}</math>)</b> | 8 ( $\pm 3$ )            | 21 ( $\pm 3$ )                | 0.03    |
| <b>Average time (hr:min) in mitosis</b>                                               | 1:00 ( $\pm 0:21$ )      | 1:01 ( $\pm 0:12$ )           | 0.96    |
| <b>Maximum basal position (% of nt total distance)</b>                                | 66% ( $\pm 5\%$ )        | 70% ( $\pm 3\%$ )             | 0.47    |

The position and velocity of the nucleus was tracked in neural tube cells during interkinetic nuclear migration. The velocity of nuclear migration and total basal distance traveled were compared between neural tube cell progenitors (neural tube cells that underwent two subsequent divisions within the neural tube) and pre-neural crest cells (neural tube cells that undergo a neural tube division followed by an EMT). *P* values were determined by one-way ANOVA with  $\alpha=0.05$ . Values are given ( $\pm$  s.e.m.). hr, hour; min, minute; nt, neural tube.
